# Supplementary figures and images for: The importance of routine genetic testing in pediatric epilepsy surgery
Source: PubMed Central journal article supplement — Epilepsia Open. 2024 Feb 17;9(2):800–7. doi: 10.1002/epi4.12916 (PMC10984286; doi:10.1002/epi4.12916), 2024-02-17

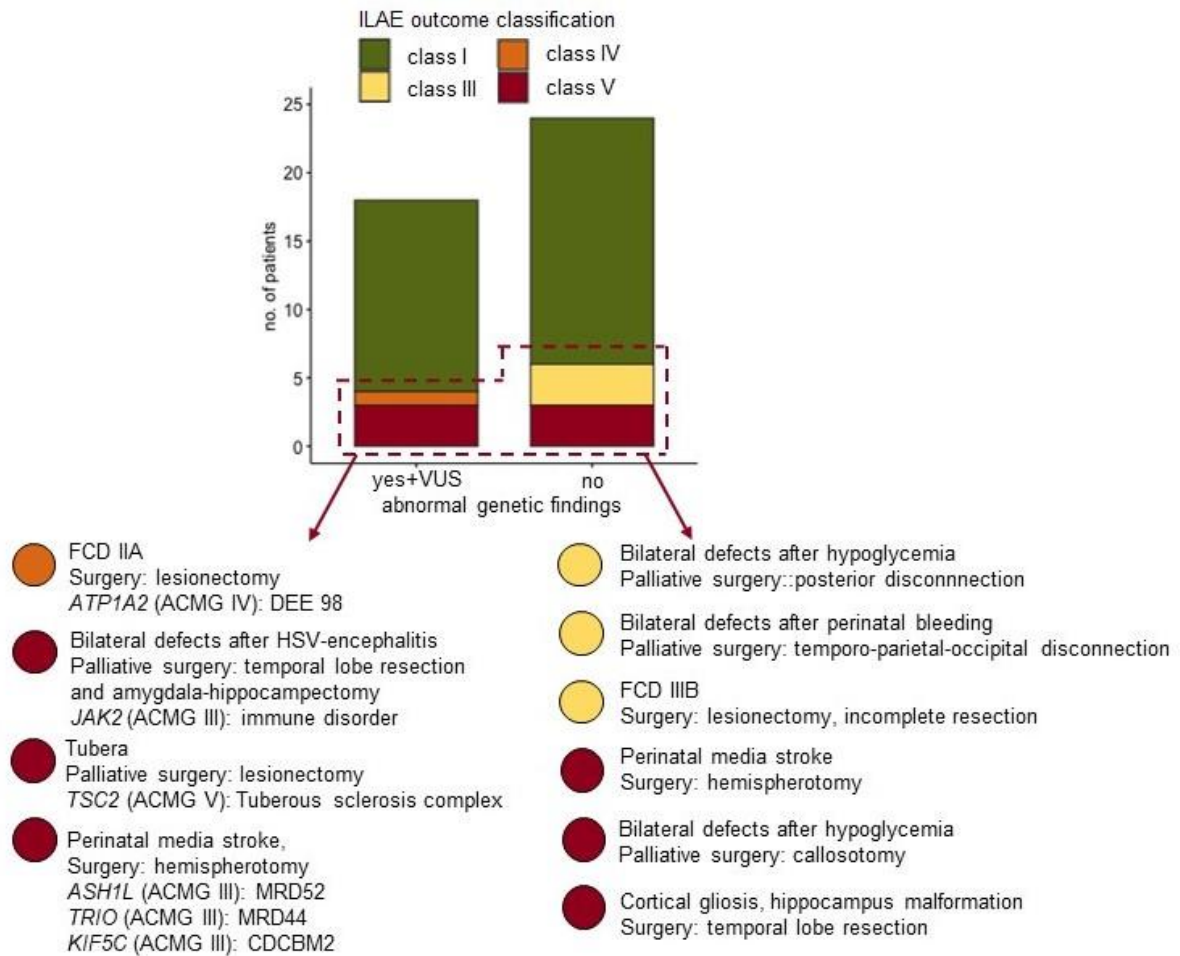

**Supplemental Figure 1: Details about patients with an ILAE outcome class of III, IV and V.**

Supplement: EPI4-9-800-s001.pdf [file EPI4-9-800-s001.pdf]
